# Supplementary material for: Molecular decay of enamel matrix protein genes in turtles and other edentulous amniotes
Source: PubMed Central journal article supplement (PMC3562159; doi:10.1186/1471-2148-13-20), 2013-01-23

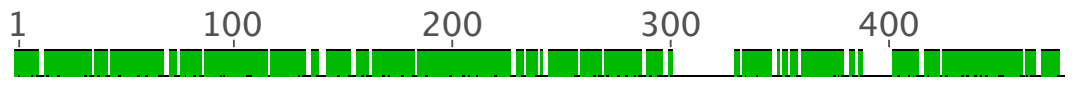

1. Alligator\_mississippiensis  
2. Chrysemys\_picta

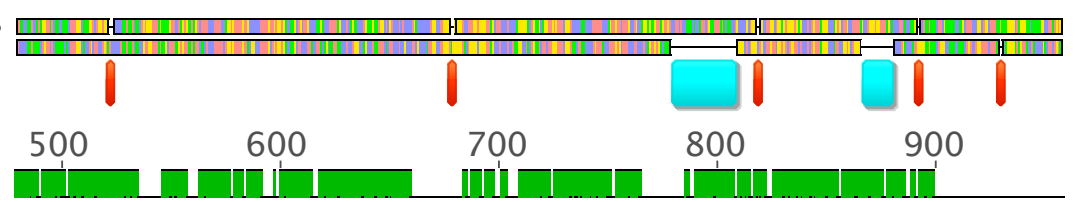

1. Alligator\_mississippiensis  
2. Chrysemys\_picta

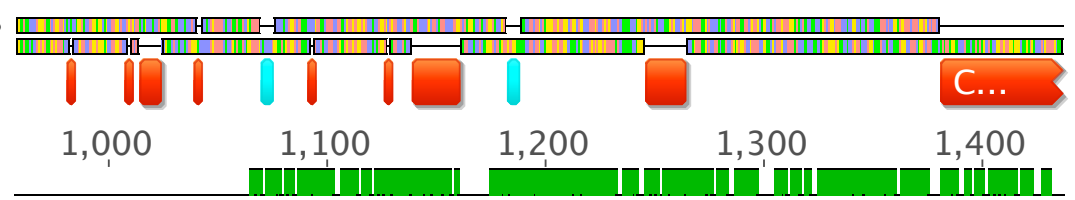

1. Alligator\_mississippiensis  
2. Chrysemys\_picta

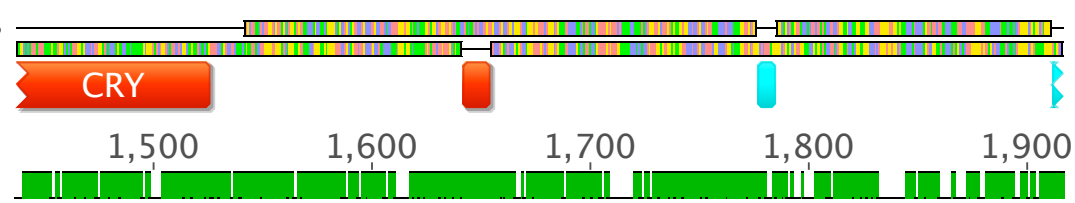

1. Alligator\_mississippiensis  
2. Chrysemys\_picta

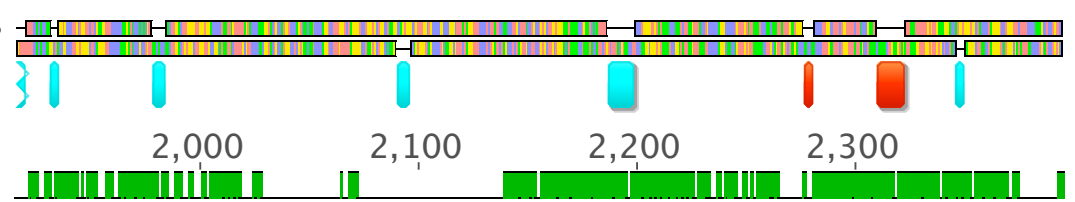

1. Alligator\_mississippiensis  
2. Chrysemys\_picta

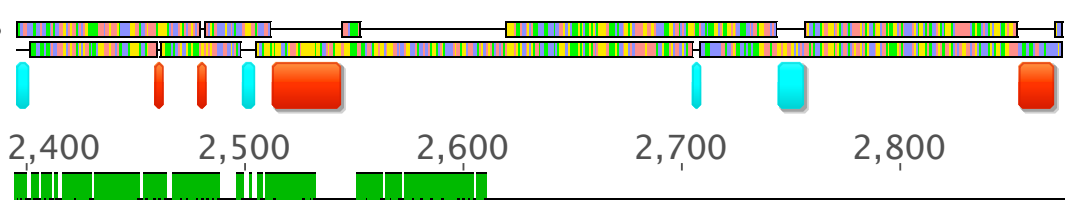

1. Alligator\_mississippiensis  
2. Chrysemys\_picta

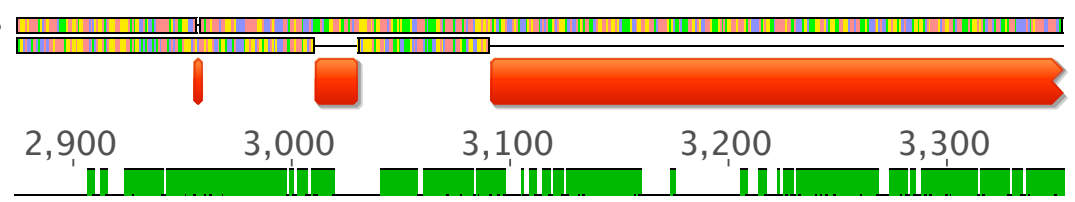

1. Alligator\_mississippiensis  
2. Chrysemys\_picta

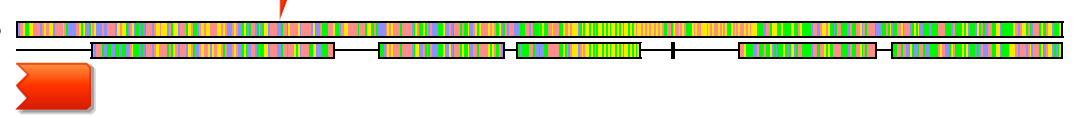

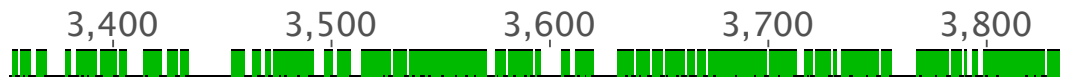

1. Alligator\_mississippiensis  
2. Chrysemys\_picta

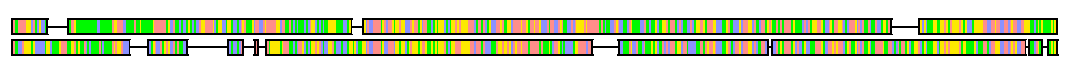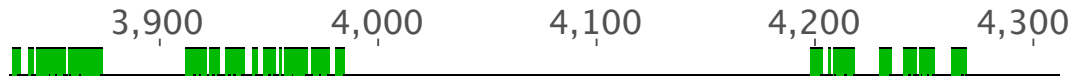

1. Alligator\_mississippiensis  
2. Chrysemys\_picta

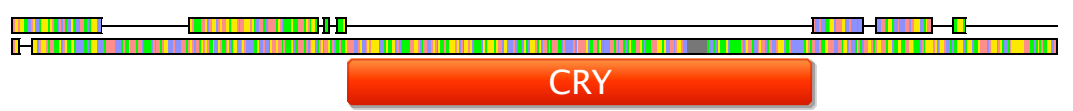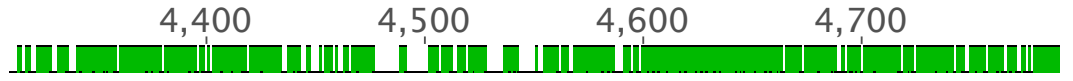

1. Alligator\_mississippiensis  
2. Chrysemys\_picta

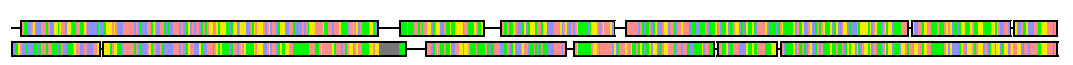

4,807

1. Alligator\_mississippiensis  
2. Chrysemys\_picta

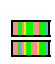

Supplement: 1471-2148-13-20-S2.pdf [file 1471-2148-13-20-S2.pdf]
